# Supplementary material for: Efficacy and Safety of Proposed Biosimilar Natalizumab (PB006) in Patients With Relapsing-Remitting Multiple Sclerosis: The Antelope Phase 3 Randomized Clinical Trial
Source: PubMed Central journal article supplement — JAMA Neurol. 2023 Jan 23;80(3):298–307. doi: 10.1001/jamaneurol.2022.5007 (PMC9871944; doi:10.1001/jamaneurol.2022.5007), 2023-01-23
Supplement: jamaneurol-e225007-s002.pdf [file jamaneurol-e225007-s002.pdf]

## Supplemental Online Content

Hemmer B, Wiendl H, Roth K, et al. Efficacy and safety of proposed biosimilar natalizumab (PB006) in patients with relapsing-remitting multiple sclerosis: the Antelope phase 3 randomized clinical trial. *JAMA Neurol*. Published online January 23, 2023.  
doi:10.1001/jamaneurol.2022.5007

**eAppendix 1.** Magnetic Resonance Imaging Secondary Endpoints in Full Analysis Set Population

**eAppendix 2.** Cumulative Number of New Active Lesions Over 24 Weeks by Corrected Stratification Variables – Sensitivity Analysis (Per-Protocol Population)

**eAppendix 3.** Kurtzke Expanded Disability Status Scale Score at Baseline by Primary Randomization (Full Analysis Set)

**eAppendix 4.** Common TEAEs (>1% of Patients in any Treatment Group) by System Organ Class and Preferred Term by Treatment Sequence (Safety population)

**eAppendix 5.** Anti-John Cunningham Virus Antibodies by Visit by Primary Randomization (Safety Population)

This supplemental material has been provided by the authors to give readers additional information about their work.

## eAppendix 1. Magnetic Resonance Imaging Secondary Endpoints in Full Analysis Set Population

eTable 1.1. Cumulative Number of New Active Lesions by Visit by Primary Randomization

| Cumulative number of new active lesions | Biosim-NTZ<br>(n=131) | Ref-NTZ<br>(n=133) |
|-----------------------------------------|-----------------------|--------------------|
| <b>... up to Week 8</b>                 |                       |                    |
| <b>n</b>                                | 125                   | 128                |
| <b>Mean</b>                             | 1.3                   | 1.7                |
| <b>SD</b>                               | 3.14                  | 3.09               |
| <b>Median</b>                           | 0.0                   | 0.0                |
| <b>Min/Max</b>                          | 0/25                  | 0/16               |
| <b>... up to Week 16</b>                |                       |                    |
| <b>n</b>                                | 124                   | 128                |
| <b>Mean</b>                             | 1.4                   | 1.8                |
| <b>SD</b>                               | 3.54                  | 3.42               |
| <b>Median</b>                           | 0.0                   | 0.0                |
| <b>Min/Max</b>                          | 0/30                  | 0/17               |
| <b>... up to Week 20</b>                |                       |                    |
| <b>n</b>                                | 126                   | 128                |
| <b>Mean</b>                             | 1.4                   | 1.8                |
| <b>SD</b>                               | 3.57                  | 3.42               |
| <b>Median</b>                           | 0.0                   | 0.0                |
| <b>Min/Max</b>                          | 0/30                  | 0/17               |
| <b>... up to Week 24</b>                |                       |                    |
| <b>n</b>                                | 126                   | 127                |
| <b>Mean</b>                             | 1.4                   | 1.9                |
| <b>SD</b>                               | 3.62                  | 3.98               |
| <b>Median</b>                           | 0.0                   | 0.0                |
| <b>Min/Max</b>                          | 0/30                  | 0/29               |
| <b>... up to Week 48</b>                |                       |                    |
| <b>n</b>                                | 122                   | 96                 |
| <b>Mean</b>                             | 1.5                   | 2.3                |
| <b>SD</b>                               | 3.72                  | 5.68               |
| <b>Median</b>                           | 0.0                   | 0.0                |
| <b>Min/Max</b>                          | 0/30                  | 0/39               |

For timepoints after Week 24, patients who switch from Ref-NTZ to Biosim-NTZ are excluded from this table.

Biosim-NTZ, biosimilar natalizumab; n, number of patients in population/treatment group; Ref-NTZ, reference natalizumab; SD, standard deviation.

**eTable 1.2. Cumulative Number of New Active Lesions by Number of MRI Scans by Visit by Primary Randomization**

| <b>Cumulative number of new active lesions/MRI scans</b> | <b>Biosim-NTZ<br/>(n=131)</b> | <b>Ref-NTZ<br/>(n=133)</b> |
|----------------------------------------------------------|-------------------------------|----------------------------|
| <b>... up to Week 8</b>                                  |                               |                            |
| <b>n</b>                                                 | 129                           | 133                        |
| <b>Cumulative number of new active lesions</b>           | 157                           | 215                        |
| <b>Total number of MRI scans</b>                         | 125                           | 128                        |
| <b>Mean number of new active lesions per MRI scan</b>    | 1.3                           | 1.7                        |
| <b>... up to Week 16</b>                                 |                               |                            |
| <b>n</b>                                                 | 126                           | 132                        |
| <b>Cumulative number of new active lesions</b>           | 170                           | 234                        |
| <b>Total number of MRI scans</b>                         | 243                           | 252                        |
| <b>Mean number of new active lesions per MRI scan</b>    | 0.7                           | 0.9                        |
| <b>... up to Week 20</b>                                 |                               |                            |
| <b>n</b>                                                 | 126                           | 131                        |
| <b>Cumulative number of new active lesions</b>           | 174                           | 233                        |
| <b>Total number of MRI scans</b>                         | 363                           | 374                        |
| <b>Mean number of new active lesions per MRI scan</b>    | 0.5                           | 0.6                        |
| <b>... up to Week 24</b>                                 |                               |                            |
| <b>n</b>                                                 | 126                           | 130                        |
| <b>Cumulative number of new active lesions</b>           | 178                           | 245                        |
| <b>Total number of MRI scans</b>                         | 485                           | 497                        |
| <b>Mean number of new active lesions per MRI scan</b>    | 0.4                           | 0.5                        |
| <b>... up to Week 48</b>                                 |                               |                            |
| <b>n</b>                                                 | 122                           | 99                         |
| <b>Cumulative number of new active lesions</b>           | 181                           | 223                        |
| <b>Total number of MRI scans</b>                         | 588                           | 466                        |
| <b>Mean number of new active lesions per MRI scan</b>    | 0.3                           | 0.5                        |

For timepoints after Week 24, patients who switched from Ref-NTZ to Biosim-NTZ are excluded from this table.

Biosim-NTZ, biosimilar natalizumab, MRI, magnetic resonance imaging; n, number of patients in population/treatment group; Ref-NTZ, reference natalizumab.

**eTable 1.3. Number of Patients with New Active Lesions by Visit by Primary Randomization**

| Number of patients with new active lesions/MRI scans (%) | Biosim-NTZ<br>(n=131) | Ref-NTZ<br>(n=133) |
|----------------------------------------------------------|-----------------------|--------------------|
| <b>Week 8</b>                                            |                       |                    |
| <b>N</b>                                                 | 125                   | 128                |
| <b>No new lesions</b>                                    | 75 (60.0)             | 74 (57.8)          |
| <b>1–3 new lesions</b>                                   | 39 (31.2)             | 30 (23.4)          |
| <b>4–6 new lesions</b>                                   | 5 (4.0)               | 13 (10.2)          |
| <b>7–9 new lesions</b>                                   | 2 (1.6)               | 5 (3.9)            |
| <b>10–12 new lesions</b>                                 | 2 (1.6)               | 4 (3.1)            |
| <b>&gt;12 new lesions</b>                                | 2 (1.6)               | 2 (1.6)            |
| <b>Week 16</b>                                           |                       |                    |
| <b>N</b>                                                 | 121                   | 124                |
| <b>No new lesions</b>                                    | 116 (95.9)            | 118 (95.2)         |
| <b>1–3 new lesions</b>                                   | 3 (2.5)               | 5 (4.0)            |
| <b>4–6 new lesions</b>                                   | 2 (1.7)               | 0                  |
| <b>7–9 new lesions</b>                                   | 0                     | 0                  |
| <b>10–12 new lesions</b>                                 | 0                     | 1 (0.8)            |
| <b>&gt;12 new lesions</b>                                | 0                     | 0                  |
| <b>Week 20</b>                                           |                       |                    |
| <b>N</b>                                                 | 120                   | 124                |
| <b>No new lesions</b>                                    | 118 (98.3)            | 124 (100)          |
| <b>1–3 new lesions</b>                                   | 2 (1.7)               | 0                  |
| <b>4–6 new lesions</b>                                   | 0                     | 0                  |
| <b>7–9 new lesions</b>                                   | 0                     | 0                  |
| <b>10–12 new lesions</b>                                 | 0                     | 0                  |
| <b>&gt;12 new lesions</b>                                | 0                     | 0                  |
| <b>Week 24</b>                                           |                       |                    |
| <b>N</b>                                                 | 121                   | 126                |
| <b>No new lesions</b>                                    | 118 (97.5)            | 125 (99.2)         |
| <b>1–3 new lesions</b>                                   | 3 (2.5)               | 0                  |
| <b>4–6 new lesions</b>                                   | 0                     | 0                  |
| <b>7–9 new lesions</b>                                   | 0                     | 0                  |
| <b>10–12 new lesions</b>                                 | 0                     | 1 (0.8)            |
| <b>&gt;12 new lesions</b>                                | 0                     | 0                  |
| <b>Week 48</b>                                           |                       |                    |
| <b>N</b>                                                 | 118                   | 93                 |
| <b>No new lesions</b>                                    | 116 (98.3)            | 88 (94.6)          |
| <b>1–3 new lesions</b>                                   | 2 (1.7)               | 2 (2.2)            |
| <b>4–6 new lesions</b>                                   | 0                     | 1 (1.1)            |
| <b>7–9 new lesions</b>                                   | 0                     | 0                  |
| <b>10–12 new lesions</b>                                 | 0                     | 1 (1.1)            |
| <b>&gt;12 new lesions</b>                                | 0                     | 1 (1.1)            |

For timepoints after Week 24, patients who switched from Ref-NTZ to Biosim-NTZ are excluded from this table.

Biosim-NTZ, biosimilar natalizumab; MRI, magnetic resonance imaging; n, number of patients in population/treatment group; Ref-NTZ, reference natalizumab.

**eTable 1.4. Cumulative Number of New GdE T1-weighted Lesions by Visit by Primary Randomization**

| Cumulative number of new GdE T1-weighted lesions | Biosim-NTZ (n=131) | Ref-NTZ (n=133) |
|--------------------------------------------------|--------------------|-----------------|
| <b>... up to Week 8</b>                          |                    |                 |
| n                                                | 125                | 128             |
| Mean                                             | 0.2                | 0.3             |
| SD                                               | 0.78               | 1.19            |
| Median                                           | 0.0                | 0.0             |
| Min/Max                                          | 0/6                | 0/11            |
| <b>... up to Week 16</b>                         |                    |                 |
| n                                                | 124                | 128             |
| Mean                                             | 0.3                | 0.4             |
| SD                                               | 0.97               | 1.22            |
| Median                                           | 0.0                | 0.0             |
| Min/Max                                          | 0/8                | 0/11            |
| <b>... up to Week 20</b>                         |                    |                 |
| n                                                | 126                | 128             |
| Mean                                             | 0.3                | 0.4             |
| SD                                               | 1.01               | 1.22            |
| Median                                           | 0.0                | 0.0             |
| Min/Max                                          | 0/8                | 0/11            |
| <b>... up to Week 24</b>                         |                    |                 |
| n                                                | 126                | 127             |
| Mean                                             | 0.3                | 0.4             |
| SD                                               | 1.01               | 1.25            |
| Median                                           | 0.0                | 0.0             |
| Min/Max                                          | 0/8                | 0/11            |
| <b>... up to Week 48</b>                         |                    |                 |
| n                                                | 122                | 96              |
| Mean                                             | 0.3                | 0.4             |
| SD                                               | 1.02               | 1.39            |
| Median                                           | 0.0                | 0.0             |
| Min/Max                                          | 0/8                | 0/11            |

For timepoints after Week 24, patients who switched from Ref-NTZ to Biosim-NTZ are excluded from this table.

Biosim-NTZ, biosimilar natalizumab; GdE, gadolinium-enhancing; n, number of patients in population/treatment group; Ref-NTZ, reference natalizumab; SD, standard deviation.

**eTable 1.5. Cumulative Number of New GdE T1-weighted Lesions by Number of MRI Scans by Visit by Primary Randomization**

| Cumulative number of new GdE T1-weighted lesions/MRI scans | Biosim-NTZ (n=131) | Ref-NTZ (n=133) |
|------------------------------------------------------------|--------------------|-----------------|
| <b>... up to Week 8</b>                                    |                    |                 |
| n                                                          | 129                | 133             |
| Cumulative number of new GdE T1-weighted lesions           | 26                 | 43              |
| Total number of MRI scans                                  | 125                | 128             |
| Mean number of new GdE T1-weighted lesions per MRI scan    | 0.2                | 0.3             |
| <b>... up to Week 16</b>                                   |                    |                 |
| n                                                          | 126                | 132             |
| Cumulative number of new GdE T1-weighted lesions           | 31                 | 47              |
| Total number of MRI scans                                  | 243                | 252             |
| Mean number of new GdE T1-weighted lesions per MRI scan    | 0.1                | 0.2             |
| <b>... up to Week 20</b>                                   |                    |                 |
| n                                                          | 126                | 131             |
| Cumulative number of new GdE T1-weighted lesions           | 33                 | 47              |
| Total number of MRI scans                                  | 363                | 374             |
| Mean number of new GdE T1-weighted lesions per MRI scan    | 0.1                | 0.1             |
| <b>... up to Week 24</b>                                   |                    |                 |
| n                                                          | 126                | 130             |
| Cumulative number of new GdE T1-weighted lesions           | 34                 | 49              |
| Total number of MRI scans                                  | 485                | 497             |
| Mean number of new GdE T1-weighted lesions per MRI scan    | 0.1                | 0.1             |
| <b>... up to Week 48</b>                                   |                    |                 |
| n                                                          | 122                | 99              |
| Cumulative number of new GdE T1-weighted lesions           | 34                 | 41              |
| Total number of MRI scans                                  | 588                | 466             |
| Mean number of new GdE T1-weighted lesions per MRI scan    | 0.1                | 0.1             |

For timepoints after Week 24, patients who switched from Ref-NTZ to Biosim-NTZ are excluded from this table.

Biosim-NTZ, biosimilar natalizumab; GdE, gadolinium-enhancing; MRI, magnetic resonance imaging; n, number of patients in population/treatment group; Ref-NTZ, reference natalizumab.

**eTable 1.6. Number of Patients with New GdE T1-weighted Lesions by Visit by Primary Randomization**

| Number of patients (%) | Biosim-NTZ<br>(n=131) | Ref-NTZ<br>(n=133) |
|------------------------|-----------------------|--------------------|
| <b>Week 8</b>          |                       |                    |
| n                      | 125                   | 128                |
| No new lesions         | 110 (88.0)            | 108 (84.4)         |
| 1–3 new lesions        | 13 (10.4)             | 17 (13.3)          |
| 4–6 new lesions        | 2 (1.6)               | 2 (1.6)            |
| 7–9 new lesions        | 0                     | 0                  |
| 10–12 new lesions      | 0                     | 1 (0.8)            |
| >12 new lesions        | 0                     | 0                  |
| <b>Week 16</b>         |                       |                    |
| n                      | 121                   | 124                |
| No new lesions         | 118 (97.5)            | 121 (97.6)         |
| 1–3 new lesions        | 3 (2.5)               | 3 (2.4)            |
| 4–6 new lesions        | 0                     | 0                  |
| 7–9 new lesions        | 0                     | 0                  |
| 10–12 new lesions      | 0                     | 0                  |
| >12 new lesions        | 0                     | 0                  |
| <b>Week 20</b>         |                       |                    |
| n                      | 120                   | 124                |
| No new lesions         | 119 (99.2)            | 124 (100)          |
| 1–3 new lesions        | 1 (0.8)               | 0                  |
| 4–6 new lesions        | 0                     | 0                  |
| 7–9 new lesions        | 0                     | 0                  |
| 10–12 new lesions      | 0                     | 0                  |
| >12 new lesions        | 0                     | 0                  |
| <b>Week 24</b>         |                       |                    |
| n                      | 121                   | 126                |
| No new lesions         | 120 (99.2)            | 125 (99.2)         |
| 1–3 new lesions        | 1 (0.8)               | 1 (0.8)            |
| 4–6 new lesions        | 0                     | 0                  |
| 7–9 new lesions        | 0                     | 0                  |
| 10–12 new lesions      | 0                     | 0                  |
| >12 new lesions        | 0                     | 0                  |
| <b>Week 48</b>         |                       |                    |
| n                      | 117                   | 93                 |
| No new lesions         | 117 (100)             | 92 (98.9)          |
| 1–3 new lesions        | 0                     | 1 (1.1)            |
| 4–6 new lesions        | 0                     | 0                  |
| 7–9 new lesions        | 0                     | 0                  |
| 10–12 new lesions      | 0                     | 0                  |
| >12 new lesions        | 0                     | 0                  |



For timepoints after Week 24, patients who switched from Ref-NTZ to Biosim-NTZ are excluded from this table.  
Biosim-NTZ, biosimilar natalizumab; GdE, gadolinium-enhancing; n, number of patients in population/treatment group; Ref-NTZ, reference natalizumab.

**eTable 1.7. Number of Patients Without New GdE T1-weighted Lesions Over 24 and 48 Weeks**

|                                                                            | <b>Biosim-NTZ<br/>(n=131)</b> | <b>Ref-NTZ<br/>(n=133)</b> |
|----------------------------------------------------------------------------|-------------------------------|----------------------------|
| <b>... Over 24 weeks</b>                                                   |                               |                            |
| <b>n</b>                                                                   | 131                           | 133                        |
| <b>Number of patients without new GdE T1-weighted lesions (%)</b>          | 109 (83.2)                    | 105 (78.9)                 |
| <b>Number of patients with at least one new GdE T1-weighted lesion (%)</b> | 17 (13.0)                     | 22 (16.5)                  |
| <b>Number of patients without sufficient MRI data (%)</b>                  | 5 (3.8)                       | 6 (4.5)                    |
| <b>... Over 48 weeks</b>                                                   |                               |                            |
| <b>n</b>                                                                   | 131                           | 103                        |
| <b>Number of patients without new GdE T1-weighted lesions (%)</b>          | 105 (80.2)                    | 80 (77.7)                  |
| <b>Number of patients with at least one new GdE T1-weighted lesion (%)</b> | 17 (13.0)                     | 16 (15.5)                  |
| <b>Number of patients without sufficient MRI data (%)</b>                  | 9 (6.9)                       | 7 (6.8)                    |

For timepoints after Week 24, patients who switched from Ref-NTZ to Biosim-NTZ are excluded from this table.

Biosim-NTZ, biosimilar natalizumab; GdE, gadolinium-enhancing; MRI, magnetic resonance imaging; n, number of patients in population/treatment group; Ref-NTZ, reference natalizumab; SD, standard deviation.

**eTable 1.8. Cumulative Number of New/Enlarging T2-weighted Lesions by Visit by Primary Randomization**

| Cumulative number of new/enlarging T2-weighted lesions | Biosim-NTZ (n=131) | Ref-NTZ (n=133) |
|--------------------------------------------------------|--------------------|-----------------|
| <b>... up to Week 8</b>                                |                    |                 |
| n                                                      | 125                | 128             |
| Mean                                                   | 1.3                | 1.8             |
| SD                                                     | 3.34               | 3.28            |
| Median                                                 | 0.0                | 0.0             |
| Min/Max                                                | 0/26               | 0/16            |
| <b>... up to Week 16</b>                               |                    |                 |
| n                                                      | 124                | 128             |
| Mean                                                   | 1.4                | 1.9             |
| SD                                                     | 3.72               | 3.59            |
| Median                                                 | 0.0                | 0.0             |
| Min/Max                                                | 0/31               | 0/17            |
| <b>... up to Week 20</b>                               |                    |                 |
| n                                                      | 126                | 128             |
| Mean                                                   | 1.5                | 1.9             |
| SD                                                     | 3.75               | 3.59            |
| Median                                                 | 0.0                | 0.0             |
| Min/Max                                                | 0/31               | 0/17            |
| <b>... up to Week 24</b>                               |                    |                 |
| n                                                      | 126                | 127             |
| Mean                                                   | 1.5                | 2.0             |
| SD                                                     | 3.79               | 4.12            |
| Median                                                 | 0.0                | 0.0             |
| Min/Max                                                | 0/31               | 0/29            |
| <b>... up to Week 48</b>                               |                    |                 |
| n                                                      | 122                | 96              |
| Mean                                                   | 1.6                | 2.4             |
| SD                                                     | 3.90               | 5.79            |
| Median                                                 | 0.0                | 0.0             |
| Min/Max                                                | 0/31               | 0/39            |

For timepoints after Week 24, patients who switched from Ref-NTZ to Biosim-NTZ are excluded from this table.

Biosim-NTZ, biosimilar natalizumab; n, number of patients in population/treatment group; Ref-NTZ, reference natalizumab; SD, standard deviation.

**eTable 1.9. Cumulative Number of New/Enlarging T2-weighted Lesions by Number of MRI Scans by Visit by Primary Randomization**

| <b>Cumulative number of new/enlarging T2-weighted lesions/MRI scans</b> | <b>Biosim-NTZ<br/>(n=131)</b> | <b>Ref-NTZ<br/>(n=133)</b> |
|-------------------------------------------------------------------------|-------------------------------|----------------------------|
| <b>... up to Week 8</b>                                                 |                               |                            |
| <b>n</b>                                                                | 129                           | 133                        |
| <b>Cumulative number of new/enlarging T2-weighted lesions</b>           | 166                           | 229                        |
| <b>Total number of MRI scans</b>                                        | 125                           | 128                        |
| <b>Mean number of new/enlarging T2-weighted lesions per MRI scan</b>    | 1.3                           | 1.8                        |
| <b>... up to Week 16</b>                                                |                               |                            |
| <b>n</b>                                                                | 126                           | 132                        |
| <b>Cumulative number of new/enlarging T2-weighted lesions</b>           | 179                           | 248                        |
| <b>Total number of MRI scans</b>                                        | 243                           | 252                        |
| <b>Mean number of new/enlarging T2-weighted lesions per MRI scan</b>    | 0.7                           | 1.0                        |
| <b>... up to Week 20</b>                                                |                               |                            |
| <b>n</b>                                                                | 126                           | 131                        |
| <b>Cumulative number of new/enlarging T2-weighted lesions</b>           | 183                           | 247                        |
| <b>Total number of MRI scans</b>                                        | 363                           | 374                        |
| <b>Mean number of new/enlarging T2-weighted lesions per MRI scan</b>    | 0.5                           | 0.7                        |
| <b>... up to Week 24</b>                                                |                               |                            |
| <b>n</b>                                                                | 126                           | 130                        |
| <b>Cumulative number of new/enlarging T2-weighted lesions</b>           | 187                           | 259                        |
| <b>Total number of MRI scans</b>                                        | 485                           | 497                        |
| <b>Mean number of new/enlarging T2-weighted lesions per MRI scan</b>    | 0.4                           | 0.5                        |
| <b>... up to Week 48</b>                                                |                               |                            |
| <b>n</b>                                                                | 122                           | 99                         |
| <b>Cumulative number of new/enlarging T2-weighted lesions</b>           | 190                           | 234                        |
| <b>Total number of MRI scans</b>                                        | 588                           | 466                        |
| <b>Mean number of new/enlarging T2-weighted lesions per MRI scan</b>    | 0.3                           | 0.5                        |

For timepoints after Week 24, patients who switched from Ref-NTZ to Biosim-NTZ are excluded from this table.

Biosim-NTZ, biosimilar natalizumab; MRI, magnetic resonance imaging; n, number of patients in population/treatment group; Ref-NTZ, reference natalizumab.

**eTable 1.10. Number of Patients with New/Enlarging T2-weighted Lesions by Visit by Primary Randomization**

| Number of patients (%) | Biosim-NTZ<br>(n=131) | Ref-NTZ<br>(n=133) |
|------------------------|-----------------------|--------------------|
| <b>Week 8</b>          |                       |                    |
| n                      | 125                   | 128                |
| No new lesions         | 74 (59.2)             | 73 (57.0)          |
| 1–3 new lesions        | 40 (32.0)             | 31 (24.2)          |
| 4–6 new lesions        | 5 (4.0)               | 13 (10.2)          |
| 7–9 new lesions        | 2 (1.6)               | 4 (3.1)            |
| 10–12 new lesions      | 1 (0.8)               | 4 (3.1)            |
| >12 new lesions        | 3 (2.4)               | 3 (2.3)            |
| <b>Week 16</b>         |                       |                    |
| n                      | 121                   | 124                |
| No new lesions         | 116 (95.9)            | 119 (96.0)         |
| 1–3 new lesions        | 3 (2.5)               | 4 (3.2)            |
| 4–6 new lesions        | 2 (1.7)               | 0                  |
| 7–9 new lesions        | 0                     | 0                  |
| 10–12 new lesions      | 0                     | 1 (0.8)            |
| >12 new lesions        | 0                     | 0                  |
| <b>Week 20</b>         |                       |                    |
| n                      | 120                   | 124                |
| No new lesions         | 118 (98.3)            | 124 (100)          |
| 1–3 new lesions        | 2 (1.7)               | 0                  |
| 4–6 new lesions        | 0                     | 0                  |
| 7–9 new lesions        | 0                     | 0                  |
| 10–12 new lesions      | 0                     | 0                  |
| >12 new lesions        | 0                     | 0                  |
| <b>Week 24</b>         |                       |                    |
| n                      | 122                   | 126                |
| No new lesions         | 119 (97.5)            | 125 (99.2)         |
| 1–3 new lesions        | 3 (2.5)               | 0                  |
| 4–6 new lesions        | 0                     | 0                  |
| 7–9 new lesions        | 0                     | 0                  |
| 10–12 new lesions      | 0                     | 1 (0.8)            |
| >12 new lesions        | 0                     | 0                  |
| <b>Week 48</b>         |                       |                    |
| n                      | 118                   | 93                 |
| No new lesions         | 116 (98.3)            | 88 (94.6)          |
| 1–3 new lesions        | 2 (1.7)               | 2 (2.2)            |
| 4–6 new lesions        | 0                     | 1 (1.1)            |
| 7–9 new lesions        | 0                     | 0                  |
| 10–12 new lesions      | 0                     | 1 (1.1)            |
| >12 new lesions        | 0                     | 1 (1.1)            |

For timepoints after Week 24, patients who switched from Ref-NTZ to Biosim-NTZ are excluded from this table.  
Biosim-NTZ, biosimilar natalizumab; n, number of patients in population/treatment group; Ref-NTZ, reference natalizumab.

**eTable 1.11. Number of Patients without New/Enlarging T2-weighted Lesions by Primary Randomization**

|                                                                                  | <b>Biosim-NTZ<br/>(n=131)</b> | <b>Ref-NTZ<br/>(n=133)</b> |
|----------------------------------------------------------------------------------|-------------------------------|----------------------------|
| <b>... Over 24 weeks</b>                                                         |                               |                            |
| <b>n</b>                                                                         | 131                           | 133                        |
| <b>Number of patients without new/enlarging T2-weighted lesions (%)</b>          | 75 (57.3)                     | 72 (54.1)                  |
| <b>Number of patients with at least one new/enlarging T2-weighted lesion (%)</b> | 51 (38.9)                     | 55 (41.4)                  |
| <b>Number of patients without sufficient MRI data (%)</b>                        | 5 (3.8)                       | 6 (4.5)                    |
| <b>... Over 48 weeks</b>                                                         |                               |                            |
| <b>n</b>                                                                         | 131                           | 103                        |
| <b>Number of patients without new/enlarging T2-weighted lesions (%)</b>          | 71 (54.2)                     | 52 (50.5)                  |
| <b>Number of patients with at least one new/enlarging T2-weighted lesion (%)</b> | 51 (38.9)                     | 44 (42.7)                  |
| <b>Number of patients without sufficient MRI data (%)</b>                        | 9 (6.9)                       | 7 (6.8)                    |

For timepoints after Week 24, patients who switched from Ref-NTZ to Biosim-NTZ are excluded from this table.

Biosim-NTZ, biosimilar natalizumab; MRI, magnetic resonance imaging; n, number of patients in population/treatment group; Ref-NTZ, reference natalizumab.

**eTable 1.12. Number of Persistent Lesions by Visit by Primary Randomization**

| Number of persistent lesions | Biosim-NTZ<br>(n=131) | Ref-NTZ<br>(n=133) |
|------------------------------|-----------------------|--------------------|
| <b>... up to Week 8</b>      |                       |                    |
| n                            | 125                   | 128                |
| Mean                         | 0.3                   | 0.3                |
| SD                           | 1.59                  | 1.34               |
| Median                       | 0.0                   | 0.0                |
| Min/Max                      | 0/16                  | 0/14               |
| <b>... up to Week 16</b>     |                       |                    |
| n                            | 124                   | 128                |
| Mean                         | 0.4                   | 0.4                |
| SD                           | 1.97                  | 2.38               |
| Median                       | 0.0                   | 0.0                |
| Min/Max                      | 0/19                  | 0/26               |
| <b>... up to Week 20</b>     |                       |                    |
| n                            | 126                   | 128                |
| Mean                         | 0.4                   | 0.4                |
| SD                           | 2.28                  | 2.90               |
| Median                       | 0.0                   | 0.0                |
| Min/Max                      | 0/22                  | 0/32               |
| <b>... up to Week 24</b>     |                       |                    |
| n                            | 126                   | 127                |
| Mean                         | 0.5                   | 0.4                |
| SD                           | 2.46                  | 2.92               |
| Median                       | 0.0                   | 0.0                |
| Min/Max                      | 0/23                  | 0/32               |
| <b>... up to Week 48</b>     |                       |                    |
| n                            | 122                   | 96                 |
| Mean                         | 0.5                   | 0.6                |
| SD                           | 2.55                  | 3.35               |
| Median                       | 0.0                   | 0.0                |
| Min/Max                      | 0/23                  | 0/32               |

For timepoints after Week 24, patients who switched from Ref-NTZ to Biosim-NTZ are excluded from this table.

Biosim-NTZ, biosimilar natalizumab; n, number of patients in population/treatment group; Ref-NTZ, reference natalizumab; SD, standard deviation.



**eTable 1.13. Cumulative Number of Persistent Lesions by Number of MRI Scans by Visit by Primary Randomization**

| <b>Cumulative number of persistent lesions/MRI scan</b> | <b>Biosim-NTZ<br/>(n=131)</b> | <b>Ref-NTZ<br/>(n=133)</b> |
|---------------------------------------------------------|-------------------------------|----------------------------|
| <b>... up to Week 8</b>                                 |                               |                            |
| <b>n</b>                                                | 129                           | 133                        |
| <b>Cumulative number of persistent lesions</b>          | 37                            | 32                         |
| <b>Total number of MRI scans</b>                        | 125                           | 128                        |
| <b>Mean number of persistent lesions per MRI scan</b>   | 0.3                           | 0.3                        |
| <b>... up to Week 16</b>                                |                               |                            |
| <b>n</b>                                                | 126                           | 132                        |
| <b>Cumulative number of persistent lesions</b>          | 49                            | 49                         |
| <b>Total number of MRI scans</b>                        | 243                           | 252                        |
| <b>Mean number of persistent lesions per MRI scan</b>   | 0.2                           | 0.2                        |
| <b>... up to Week 20</b>                                |                               |                            |
| <b>n</b>                                                | 126                           | 131                        |
| <b>Cumulative number of persistent lesions</b>          | 56                            | 56                         |
| <b>Total number of MRI scans</b>                        | 363                           | 374                        |
| <b>Mean number of persistent lesions per MRI scan</b>   | 0.2                           | 0.2                        |
| <b>... up to Week 24</b>                                |                               |                            |
| <b>n</b>                                                | 126                           | 130                        |
| <b>Cumulative number of persistent lesions</b>          | 61                            | 57                         |
| <b>Total number of MRI scans</b>                        | 485                           | 497                        |
| <b>Mean number of persistent lesions per MRI scan</b>   | 0.1                           | 0.1                        |
| <b>... up to Week 48</b>                                |                               |                            |
| <b>n</b>                                                | 122                           | 99                         |
| <b>Cumulative number of persistent lesions</b>          | 63                            | 54                         |
| <b>Total number of MRI scans</b>                        | 588                           | 466                        |
| <b>Mean number of persistent lesions per MRI Scan</b>   | 0.1                           | 0.1                        |

For timepoints after Week 24, patients who switched from Ref-NTZ to Biosim-NTZ are excluded from this table.

Biosim-NTZ, biosimilar natalizumab; MRI, magnetic resonance imaging; n, number of patients in population/treatment group; Ref-NTZ, reference natalizumab.

**eTable 1.14. Number of Patients with Persistent Lesions by Visit by Primary Randomization**

| Number of patients (%)    | Biosim-NTZ<br>(n=131) | Ref-NTZ<br>(n=133) |
|---------------------------|-----------------------|--------------------|
| <b>Week 8</b>             |                       |                    |
| <b>n</b>                  | 125                   | 128                |
| <b>No new lesions</b>     | 114 (91.2)            | 114 (89.1)         |
| <b>1–3 new lesions</b>    | 9 (7.2)               | 12 (9.4)           |
| <b>4–6 new lesions</b>    | 1 (0.8)               | 1 (0.8)            |
| <b>7–9 new lesions</b>    | 0                     | 0                  |
| <b>10–12 new lesions</b>  | 0                     | 0                  |
| <b>&gt;12 new lesions</b> | 1 (0.8)               | 1 (0.8)            |
| <b>Week 16</b>            |                       |                    |
| <b>n</b>                  | 121                   | 124                |
| <b>No new lesions</b>     | 114 (94.2)            | 119 (96.0)         |
| <b>1–3 new lesions</b>    | 7 (5.8)               | 4 (3.2)            |
| <b>4–6 new lesions</b>    | 0                     | 0                  |
| <b>7–9 new lesions</b>    | 0                     | 0                  |
| <b>10–12 new lesions</b>  | 0                     | 1 (0.8)            |
| <b>&gt;12 new lesions</b> | 0                     | 0                  |
| <b>Week 20</b>            |                       |                    |
| <b>n</b>                  | 120                   | 124                |
| <b>No new lesions</b>     | 116 (96.7)            | 122 (98.4)         |
| <b>1–3 new lesions</b>    | 4 (3.3)               | 1 (0.8)            |
| <b>4–6 new lesions</b>    | 0                     | 1 (0.8)            |
| <b>7–9 new lesions</b>    | 0                     | 0                  |
| <b>10–12 new lesions</b>  | 0                     | 0                  |
| <b>&gt;12 new lesions</b> | 0                     | 0                  |
| <b>Week 24</b>            |                       |                    |
| <b>n</b>                  | 121                   | 126                |
| <b>No new lesions</b>     | 117 (96.7)            | 125 (99.2)         |
| <b>1–3 new lesions</b>    | 4 (3.3)               | 1 (0.8)            |
| <b>4–6 new lesions</b>    | 0                     | 0                  |
| <b>7–9 new lesions</b>    | 0                     | 0                  |
| <b>10–12 new lesions</b>  | 0                     | 0                  |
| <b>&gt;12 new lesions</b> | 0                     | 0                  |
| <b>Week 48</b>            |                       |                    |
| <b>n</b>                  | 117                   | 93                 |
| <b>No new lesions</b>     | 115 (98.3)            | 93 (100)           |
| <b>1–3 new lesions</b>    | 2 (1.7)               | 0                  |
| <b>4–6 new lesions</b>    | 0                     | 0                  |
| <b>7–9 new lesions</b>    | 0                     | 0                  |
| <b>10–12 new lesions</b>  | 0                     | 0                  |
| <b>&gt;12 new lesions</b> | 0                     | 0                  |

For timepoints after Week 24, patients who switched from Ref-NTZ to Biosim-NTZ are excluded from this table.  
Biosim-NTZ, biosimilar natalizumab; n, number of patients in population/treatment group; Ref-NTZ, reference natalizumab.

**eAppendix 2. Cumulative Number of New Active Lesions Over 24 Weeks by Corrected Stratification Variables – Sensitivity Analysis (Per-Protocol Population)**

| <b>Cumulative number of new active lesions over 24 weeks</b> | <b>Estimate (SE)</b> | <b>90% Confidence interval</b> | <b>95% Confidence interval</b> |
|--------------------------------------------------------------|----------------------|--------------------------------|--------------------------------|
| <b>Least square means</b>                                    |                      |                                |                                |
| <b>Biosim-NTZ</b>                                            | -1.31 (0.642)        |                                |                                |
| <b>Ref-NTZ</b>                                               | -1.10 (0.630)        |                                |                                |
| <b>Difference Biosim-NTZ–Ref-NTZ</b>                         | 0.21 (0.247)         | -0.198; 0.615                  | -0.276; 0.692                  |
| <b>Exponentiated difference Biosim-NTZ–Ref-NTZ</b>           | 0.06 (0.083)         | -0.073; 0.199                  | -0.099; 0.225                  |

Biosim-NTZ, biosimilar natalizumab; Ref-NTZ, reference natalizumab; SE, standard error.

**eAppendix 3. Kurtzke Expanded Disability Status Scale Score at Baseline by Primary Randomization (Full Analysis Set)**

|                            | <b>Biosim-NTZ<br/>(n=131)</b> | <b>Ref-NTZ<br/>(n=133)</b> | <b>Total<br/>(N=264)</b> |
|----------------------------|-------------------------------|----------------------------|--------------------------|
| <b>Baseline EDSS</b>       |                               |                            |                          |
| <b>Mean (SD)</b>           | 3.4 (1.1)                     | 3.2 (1.2)                  | 3.3 (1.1)                |
| <b>Median</b>              | 3.5                           | 3.5                        | 3.5                      |
| <b>Q1/Q3</b>               | 2.5/4.0                       | 2.0/4.0                    | 2.5/4.0                  |
| <b>Interquartile range</b> | 1.5                           | 2.0                        | 1.5                      |
| <b>Minimum/maximum</b>     | 2/5                           | 1/5                        | 1/5                      |

Biosim-NTZ, biosimilar natalizumab; EDSS, Kurtzke Expanded Disability Status Scale; Ref-NTZ, reference natalizumab; SD, standard deviation.

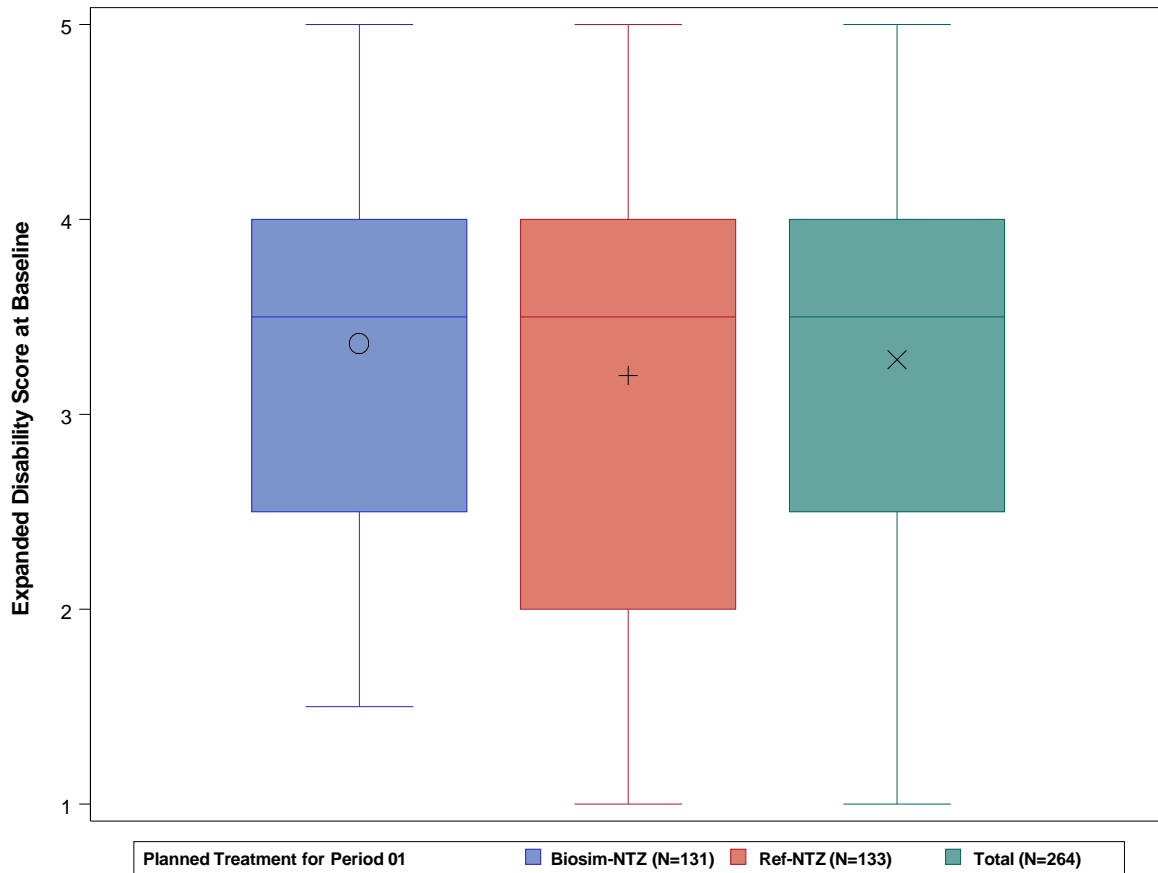

**eAppendix 4. Common TEAEs (>1% of Patients in any Treatment Group) by System Organ Class and Preferred Term by Treatment Sequence (Safety population)**

|                                                                     | <b>Biosim-NTZ<br/>(n=131)</b>                |                                                               | <b>Biosim-NTZ after switch<br/>from Ref-NTZ (n=30)</b> |                                                               | <b>Ref-NTZ<br/>(n=103)</b>               |                                                               |
|---------------------------------------------------------------------|----------------------------------------------|---------------------------------------------------------------|--------------------------------------------------------|---------------------------------------------------------------|------------------------------------------|---------------------------------------------------------------|
| <b>System organ class<br/>Preferred term</b>                        | <b>Patients<br/>with<br/>event<br/>n (%)</b> | <b>Number of<br/>events / rate<br/>per 100 PY<sup>a</sup></b> | <b>Patients<br/>with<br/>event<br/>n (%)</b>           | <b>Number of<br/>events / rate<br/>per 100 PY<sup>a</sup></b> | <b>Patients<br/>with event<br/>n (%)</b> | <b>Number of<br/>events / rate<br/>per 100 PY<sup>a</sup></b> |
| <b>Any event</b>                                                    | <b>85 (64.9)</b>                             | <b>221 / 192.3</b>                                            | <b>22 (73.3)</b>                                       | <b>60 / 219.6</b>                                             | <b>71 (68.9)</b>                         | <b>176 / 194.7</b>                                            |
| <b>Blood and lymphatic<br/>system disorders</b>                     | <b>5 (3.8)</b>                               | <b>5 / 4.4</b>                                                | <b>0 (0.0)</b>                                         | <b>0 / 0</b>                                                  | <b>4 (3.9)</b>                           | <b>4 / 4.4</b>                                                |
| Anemia                                                              | 4 (3.1)                                      | 4 / 3.5                                                       | 0 (0.0)                                                | 0 / 0                                                         | 0 (0.0)                                  | 0 / 0                                                         |
| <b>Ear and labyrinth<br/>disorders</b>                              | <b>2 (1.5)</b>                               | <b>2 / 1.7</b>                                                | <b>0 (0.0)</b>                                         | <b>0 / 0</b>                                                  | <b>0 (0.0)</b>                           | <b>0 / 0</b>                                                  |
| <b>Gastrointestinal<br/>disorders</b>                               | <b>13 (9.9)</b>                              | <b>17 / 14.8</b>                                              | <b>0 (0.0)</b>                                         | <b>0 / 0</b>                                                  | <b>12 (11.7)</b>                         | <b>18 / 19.9</b>                                              |
| Diarrhea                                                            | 3 (2.3)                                      | 3 / 2.6                                                       | 0 (0.0)                                                | 0 / 0                                                         | 5 (4.9)                                  | 5 / 5.5                                                       |
| Nausea                                                              | 4 (3.1)                                      | 4 / 3.5                                                       | 0 (0.0)                                                | 0 / 0                                                         | 3 (2.9)                                  | 3 / 3.3                                                       |
| Constipation                                                        | 2 (1.5)                                      | 2 / 1.7                                                       | 0 (0.0)                                                | 0 / 0                                                         | 3 (2.9)                                  | 4 / 4.4                                                       |
| Vomiting                                                            | 0 (0.0)                                      | 0 / 0                                                         | 0 (0.0)                                                | 0 / 0                                                         | 2 (1.9)                                  | 2 / 2.2                                                       |
| <b>General disorders<br/>and administration<br/>site conditions</b> | <b>13 (9.9)</b>                              | <b>14 / 12.2</b>                                              | <b>7 (23.3)</b>                                        | <b>8 / 29.3</b>                                               | <b>5 (4.9)</b>                           | <b>5 / 5.5</b>                                                |
| Asthenia                                                            | 5 (3.8)                                      | 5 / 4.4                                                       | 1 (3.3)                                                | 1 / 3.7                                                       | 1 (1.0)                                  | 1 / 1.1                                                       |
| Fatigue                                                             | 5 (3.8)                                      | 5 / 4.4                                                       | 0 (0.0)                                                | 0 / 0                                                         | 1 (1.0)                                  | 1 / 1.1                                                       |
| Pyrexia                                                             | 1 (0.8)                                      | 1 / 0.9                                                       | 1 (3.3)                                                | 1 / 3.7                                                       | 3 (2.9)                                  | 3 / 3.3                                                       |
| Hyperthermia                                                        | 2 (1.5)                                      | 2 / 1.7                                                       | 1 (3.3)                                                | 1 / 3.7                                                       | 0 (0.0)                                  | 0 / 0                                                         |
| Feeling hot                                                         | 0 (0.0)                                      | 0 / 0                                                         | 2 (6.7)                                                | 2 / 7.3                                                       | 0 (0.0)                                  | 0 / 0                                                         |
| Edema peripheral                                                    | 1 (0.8)                                      | 1 / 0.9                                                       | 1 (3.3)                                                | 1 / 3.7                                                       | 0 (0.0)                                  | 0 / 0                                                         |
| Discomfort                                                          | 0 (0.0)                                      | 0 / 0                                                         | 1 (3.3)                                                | 1 / 3.7                                                       | 0 (0.0)                                  | 0 / 0                                                         |
| Infusion site pain                                                  | 0 (0.0)                                      | 0 / 0                                                         | 1 (3.3)                                                | 1 / 3.7                                                       | 0 (0.0)                                  | 0 / 0                                                         |
| <b>Hepatobiliary<br/>disorders</b>                                  | <b>2 (1.5)</b>                               | <b>2 / 1.7</b>                                                | <b>1 (3.3)</b>                                         | <b>1 / 3.7</b>                                                | <b>1 (1.0)</b>                           | <b>1 / 1.1</b>                                                |
| Hyperbilirubinemia                                                  | 1 (0.8)                                      | 1 / 0.9                                                       | 1 (3.3)                                                | 1 / 3.7                                                       | 0                                        | 0 / 0                                                         |
| <b>Immune system<br/>disorders</b>                                  | <b>0 (0.0)</b>                               | <b>0 / 0</b>                                                  | <b>1 (3.3)</b>                                         | <b>1 / 3.7</b>                                                | <b>0 (0.0)</b>                           | <b>0 / 0</b>                                                  |
| Hypersensitivity                                                    | 0                                            | 0 / 0                                                         | 1 (3.3)                                                | 1 / 3.7                                                       | 0                                        | 0 / 0                                                         |
| <b>Infections and<br/>infestations</b>                              | <b>39 (29.8)</b>                             | <b>54 / 47.0</b>                                              | <b>15 (50.0)</b>                                       | <b>19 / 69.6</b>                                              | <b>34 (33.0)</b>                         | <b>44 / 48.7</b>                                              |
| Nasopharyngitis                                                     | 11 (8.4)                                     | 16 / 13.9                                                     | 5 (16.7)                                               | 5 / 18.3                                                      | 8 (7.8)                                  | 9 / 10.0                                                      |
| COVID-19                                                            | 11 (8.4)                                     | 11 / 9.6                                                      | 4 (13.3)                                               | 4 / 14.6                                                      | 6 (5.8)                                  | 6 / 6.6                                                       |
| Upper respiratory<br>tract infection                                | 2 (1.5)                                      | 2 / 1.7                                                       | 1 (3.3)                                                | 1 / 3.7                                                       | 3 (2.9)                                  | 3 / 3.3                                                       |
| Pharyngitis                                                         | 1 (0.8)                                      | 2 / 1.7                                                       | 1 (3.3)                                                | 1 / 3.7                                                       | 3 (2.9)                                  | 4 / 4.4                                                       |
| Pneumonia                                                           | 3 (2.3)                                      | 3 / 2.6                                                       | 0 (0.0)                                                | 0 / 0                                                         | 1 (1.0)                                  | 1 / 1.1                                                       |

|                                                        |                  |                  |                |                 |                |                  |
|--------------------------------------------------------|------------------|------------------|----------------|-----------------|----------------|------------------|
| Respiratory tract infection                            | 2 (1.5)          | 2 / 1.7          | 1 (3.3)        | 1 / 3.7         | 1 (1.0)        | 1 / 1.1          |
| Urinary tract infection                                | 2 (1.5)          | 2 / 1.7          | 0 (0.0)        | 0 / 0           | 2 (1.9)        | 3 / 3.3          |
| Bronchitis                                             | 0 (0.0)          | 0 / 0            | 1 (3.3)        | 1 / 3.7         | 2 (1.9)        | 3 / 3.3          |
| Cystitis                                               | 2 (1.5)          | 2 / 1.7          | 0 (0.0)        | 0 / 0           | 1 (1.0)        | 1 / 1.1          |
| Oral herpes                                            | 1 (0.8)          | 1 / 0.9          | 1 (3.3)        | 1 / 3.7         | 1 (1.0)        | 1 / 1.1          |
| Rhinitis                                               | 1 (0.8)          | 1 / 0.9          | 1 (3.3)        | 1 / 3.7         | 1 (1.0)        | 1 / 1.1          |
| Respiratory tract infection viral                      | 1 (0.8)          | 1 / 0.9          | 1 (3.3)        | 1 / 3.7         | 0 (0.0)        | 0 / 0            |
| COVID-19 pneumonia                                     | 0 (0.0)          | 0 / 0            | 1 (3.3)        | 1 / 3.7         | 0 (0.0)        | 0 / 0            |
| Laryngitis                                             | 0 (0.0)          | 0 / 0            | 1 (3.3)        | 1 / 3.7         | 0 (0.0)        | 0 / 0            |
| Pyoderma streptococcal                                 | 0 (0.0)          | 0 / 0            | 1 (3.3)        | 1 / 3.7         | 0 (0.0)        | 0 / 0            |
| <b>Injury, poisoning and procedural complications</b>  | <b>2 (1.5)</b>   | <b>4 / 3.5</b>   | <b>1 (3.3)</b> | <b>1 / 3.7</b>  | <b>3 (2.9)</b> | <b>3 / 3.3</b>   |
| Contusion                                              | 0 (0.0)          | 0 / 0            | 1 (3.3)        | 1 / 3.7         | 1 (1.0)        | 1 / 1.1          |
| <b>Investigations</b>                                  | <b>8 (6.1)</b>   | <b>11 / 9.6</b>  | <b>2 (6.7)</b> | <b>3 / 11.0</b> | <b>9 (8.7)</b> | <b>11 / 12.2</b> |
| Weight decreased                                       | 2 (1.5)          | 2 / 1.7          | 1 (3.3)        | 1 / 3.7         | 3 (2.9)        | 3 / 3.3          |
| Alanine aminotransferase increased                     | 2 (1.5)          | 2 / 1.7          | 0 (0.0)        | 0 / 0           | 1 (1.0)        | 2 / 2.2          |
| Blood pressure increased                               | 1 (0.8)          | 1 / 0.9          | 0 (0.0)        | 0 / 0           | 2 (1.9)        | 2 / 2.2          |
| C-reactive protein increased                           | 2 (1.5)          | 2 / 1.7          | 0 (0.0)        | 0 / 0           | 1 (1.0)        | 1 / 1.1          |
| Gamma-glutamyl transferase increased                   | 1 (0.8)          | 1 / 0.9          | 1 (3.3)        | 2 / 7.3         | 0 (0.0)        | 0 / 0            |
| <b>Metabolism and nutrition disorders</b>              | <b>1 (0.8)</b>   | <b>1 / 0.9</b>   | <b>1 (3.3)</b> | <b>1 / 3.7</b>  | <b>2 (1.9)</b> | <b>3 / 3.3</b>   |
| Hyperlipidemia                                         | 0 (0.0)          | 0 / 0            | 1 (3.3)        | 1 / 3.7         | 0 (0.0)        | 0 / 0            |
| <b>Musculoskeletal and connective tissue disorders</b> | <b>17 (13.0)</b> | <b>21 / 18.3</b> | <b>1 (3.3)</b> | <b>1 / 3.7</b>  | <b>9 (8.7)</b> | <b>13 / 14.4</b> |
| Back pain                                              | 7 (5.3)          | 7 / 6.1          | 1 (3.3)        | 1 / 3.7         | 3 (2.9)        | 3 / 3.3          |
| Pain in extremity                                      | 2 (1.5)          | 2 / 1.7          | 0 (0.0)        | 0 / 0           | 4 (3.9)        | 4 / 4.4          |
| Muscle spasms                                          | 2 (1.5)          | 2 / 1.7          | 0 (0.0)        | 0 / 0           | 1 (1.0)        | 1 / 1.1          |
| Myalgia                                                | 2 (1.5)          | 2 / 1.7          | 0 (0.0)        | 0 / 0           | 1 (1.0)        | 1 / 1.1          |
| Neck pain                                              | 1 (0.8)          | 2 / 1.7          | 0 (0.0)        | 0 / 0           | 2 (1.9)        | 2 / 2.2          |
| Arthralgia                                             | 2 (1.5)          | 2 / 1.7          | 0 (0.0)        | 0 / 0           | 0 (0.0)        | 0 / 0            |
| Musculoskeletal stiffness                              | 0 (0.0)          | 0 / 0            | 0 (0.0)        | 0 / 0           | 2 (1.9)        | 2 / 2.2          |
| <b>Neoplasms benign, malignant, and</b>                | <b>2 (1.5)</b>   | <b>2 / 1.7</b>   | <b>0 (0.0)</b> | <b>0 / 0</b>    | <b>0 (0.0)</b> | <b>0 / 0</b>     |

|                                                         |                  |                  |                 |                  |                  |                  |
|---------------------------------------------------------|------------------|------------------|-----------------|------------------|------------------|------------------|
| unspecified (incl. cysts and polyps)                    |                  |                  |                 |                  |                  |                  |
| <b>Nervous system disorders</b>                         | <b>33 (25.2)</b> | <b>48 / 41.8</b> | <b>8 (26.7)</b> | <b>13 / 47.6</b> | <b>24 (23.3)</b> | <b>56 / 62.0</b> |
| Headache                                                | 25 (19.1)        | 36 / 31.3        | 4 (13.3)        | 5 / 18.3         | 19 (18.4)        | 47 / 52.0        |
| Dizziness                                               | 3 (2.3)          | 3 / 2.6          | 2 (6.7)         | 2 / 7.3          | 1 (1.0)          | 2 / 2.2          |
| Hypoesthesia                                            | 2 (1.5)          | 2 / 1.7          | 1 (3.3)         | 1 / 3.7          | 1 (1.0)          | 1 / 1.1          |
| Paranesthesia                                           | 1 (0.8)          | 1 / 0.9          | 1 (3.3)         | 1 / 3.7          | 0 (0.0)          | 0 / 0            |
| Presyncope                                              | 1 (0.8)          | 1 / 0.9          | 1 (3.3)         | 1 / 3.7          | 0 (0.0)          | 0 / 0            |
| Tension headache                                        | 1 (0.8)          | 2 / 1.7          | 1 (3.3)         | 3 / 11.0         | 0 (0.0)          | 0 / 0            |
| <b>Psychiatric disorders</b>                            | <b>7 (5.3)</b>   | <b>10 / 8.7</b>  | <b>4 (13.3)</b> | <b>4 / 14.6</b>  | <b>2 (1.9)</b>   | <b>2 / 2.2</b>   |
| Depression                                              | 3 (2.3)          | 3 / 2.6          | 3 (10.0)        | 3 / 11.0         | 1 (1.0)          | 1 / 1.1          |
| Insomnia                                                | 4 (3.1)          | 6 / 5.2          | 0 (0.0)         | 0 / 0            | 1 (1.0)          | 1 / 1.1          |
| Sleep disorder                                          | 0 (0.0)          | 0 / 0            | 1 (3.3)         | 1 / 3.7          | 0 (0.0)          | 0 / 0            |
| <b>Renal and urinary disorders</b>                      | <b>1 (0.8)</b>   | <b>1 / 0.9</b>   | <b>3 (10.0)</b> | <b>4 / 14.6</b>  | <b>2 (1.9)</b>   | <b>4 / 4.4</b>   |
| Leukocyturia                                            | 0 (0.0)          | 0 / 0            | 1 (3.3)         | 1 / 3.7          | 1 (1.0)          | 1 / 1.1          |
| Dysuria                                                 | 0 (0.0)          | 0 / 0            | 1 (3.3)         | 1 / 3.7          | 0 (0.0)          | 0 / 0            |
| Hematuria                                               | 0 (0.0)          | 0 / 0            | 1 (3.3)         | 1 / 3.7          | 0 (0.0)          | 0 / 0            |
| Urinary retention                                       | 0 (0.0)          | 0 / 0            | 1 (3.3)         | 1 / 3.7          | 0 (0.0)          | 0 / 0            |
| <b>Reproductive system and breast disorders</b>         | <b>3 (2.3)</b>   | <b>3 / 2.6</b>   | <b>0 (0.0)</b>  | <b>0 / 0</b>     | <b>1 (1.0)</b>   | <b>1 / 1.1</b>   |
| <b>Respiratory, thoracic, and mediastinal disorders</b> | <b>10 (7.6)</b>  | <b>11 / 9.6</b>  | <b>1 (3.3)</b>  | <b>1 / 3.7</b>   | <b>4 (3.9)</b>   | <b>5 / 5.5</b>   |
| Oropharyngeal pain                                      | 5 (3.8)          | 5 / 4.4          | 0 (0.0)         | 0 / 0            | 3 (2.9)          | 3 / 3.3          |
| Rhinorrhea                                              | 1 (0.8)          | 1 / 0.9          | 1 (3.3)         | 1 / 3.7          | 0 (0.0)          | 0 / 0            |
| <b>Skin and subcutaneous tissue disorders</b>           | <b>8 (6.1)</b>   | <b>10 / 8.7</b>  | <b>2 (6.7)</b>  | <b>2 / 7.3</b>   | <b>3 (2.9)</b>   | <b>4 / 4.4</b>   |
| Urticaria                                               | 2 (1.5)          | 2 / 1.7          | 0 (0.0)         | 0 / 0            | 1 (1.0)          | 1 / 1.1          |
| Erythema                                                | 1 (0.8)          | 1 / 0.9          | 1 (3.3)         | 1 / 3.7          | 0 (0.0)          | 0 / 0            |
| Hyperhidrosis                                           | 1 (0.8)          | 1 / 0.9          | 1 (3.3)         | 1 / 3.7          | 0 (0.0)          | 0 / 0            |
| Pruritus                                                | 2 (1.5)          | 2 / 1.7          | 0 (0.0)         | 0 / 0            | 0 (0.0)          | 0 / 0            |
| <b>Vascular disorders</b>                               | <b>4 (3.1)</b>   | <b>4 / 3.5</b>   | <b>1 (3.3)</b>  | <b>1 / 3.7</b>   | <b>0 (0.0)</b>   | <b>0 / 0</b>     |
| Hypotension                                             | 2 (1.5)          | 2 / 1.7          | 0               | 0 / 0            | 0 (0.0)          | 0 / 0            |
| Hypertension                                            | 0 (0.0)          | 0 / 0            | 1 (3.3)         | 1 / 3.7          | 0 (0.0)          | 0 / 0            |

<sup>a</sup>Patient-years calculated as the sum of (last day of follow-up – first day of exposure + 1)/365.25 for all patients in group. AEs are summarized according to the randomized study drug sequence.

AE, adverse event; Biosim-NTZ, biosimilar natalizumab; PY, patient-years; Ref-NTZ, reference natalizumab; TEAEs, treatment-emergent adverse event.



**eAppendix 5. Anti-John Cunningham Virus Antibodies by Visit by Primary Randomization (Safety Population)**

| Number of patients (%)                     | Biosim-NTZ<br>(n=131) | Ref-NTZ<br>(n=133) | Total<br>(N=264) |
|--------------------------------------------|-----------------------|--------------------|------------------|
| <b>Baseline</b>                            |                       |                    |                  |
| <b>n</b>                                   | 131 (100)             | 133 (100)          | 264 (100)        |
| <b>Positive, index &gt;1.5</b>             | 0                     | 0                  | 0                |
| <b>Positive, index between 0.9 and 1.5</b> | 16 (12.2)             | 18 (13.5)          | 34 (12.9)        |
| <b>Positive, index ≤0.9</b>                | 35 (26.7)             | 37(27.8)           | 72 (27.3)        |
| <b>Negative</b>                            | 80 (61.1)             | 78 (58.6)          | 158 (59.8)       |
| <b>Week 24</b>                             |                       |                    |                  |
| <b>n</b>                                   | 103 (100)             | 111 (100)          | 214 (100)        |
| <b>Positive, index &gt;1.5</b>             | 5 (4.9)               | 5 (4.5)            | 10 (4.7)         |
| <b>Positive, index between 0.9 and 1.5</b> | 7 (6.8)               | 13 (11.7)          | 20 (9.3)         |
| <b>Positive, index ≤0.9</b>                | 35 (34.0)             | 29 (26.1)          | 64 (29.9)        |
| <b>Negative</b>                            | 56 (54.4)             | 63 (56.8)          | 119 (55.6)       |
| <b>Indeterminate</b>                       | 0                     | 1 (0.9)            | 1 (0.5)          |
| <b>Week 48</b>                             |                       |                    |                  |
| <b>n</b>                                   | 116 (100)             | 119 (100)          | 235 (100)        |
| <b>Positive, index &gt;1.5</b>             | 7 (6.0)               | 7 (5.9)            | 14 (6.0)         |
| <b>Positive, index between 0.9 and 1.5</b> | 4 (3.4)               | 9 (7.6)            | 13 (5.5)         |
| <b>Positive, index ≤0.9</b>                | 38 (32.8)             | 34 (28.6)          | 72 (30.6)        |
| <b>Negative</b>                            | 67 (57.8)             | 69 (58.0)          | 136 (57.9)       |

Biosim-NTZ, biosimilar natalizumab; n, number of patients in population/treatment group; Ref-NTZ, reference natalizumab.
