# Supplementary material for: Efficacy and Safety of Proposed Biosimilar Natalizumab (PB006) in Patients With Relapsing-Remitting Multiple Sclerosis: The Antelope Phase 3 Randomized Clinical Trial
Source: PubMed Central journal article supplement — JAMA Neurol. 2023 Jan 23;80(3):298–307. doi: 10.1001/jamaneurol.2022.5007 (PMC9871944; doi:10.1001/jamaneurol.2022.5007), 2023-01-23
Supplement: jamaneurol-e225007-s003.pdf [file jamaneurol-e225007-s003.pdf]

## Data Sharing Statement

Hemmer. Efficacy and Safety of Proposed Biosimilar Natalizumab (PB006) in Patients With Relapsing-Remitting Multiple Sclerosis. *JAMA Neurol.* Published January 23, 2023.  
doi:10.1001/jamaneurol.2022.5007

### Data

**Data available:** No
